# Supplementary material for: The Effectiveness of Information Technology-Supported Shared Care for Patients With Chronic Disease: A Systematic Review
Source: PubMed Central journal article supplement (PMC5500776; doi:10.2196/jmir.7405), 2017-06-22
Supplement: jmir_v19i6e221_app2.pdf [file jmir_v19i6e221_app2.pdf]

| Study                                           | Design                                                                          |                                |                |                                                                                                                                                                          | Intervention characteristics and supporting information technology (in italics)                                                                                                                                                                                                                                                                                                                                                                                                                       |
|-------------------------------------------------|---------------------------------------------------------------------------------|--------------------------------|----------------|--------------------------------------------------------------------------------------------------------------------------------------------------------------------------|-------------------------------------------------------------------------------------------------------------------------------------------------------------------------------------------------------------------------------------------------------------------------------------------------------------------------------------------------------------------------------------------------------------------------------------------------------------------------------------------------------|
|                                                 | Patient target population                                                       | Measurement time points        | Control group  | Outcome measures                                                                                                                                                         |                                                                                                                                                                                                                                                                                                                                                                                                                                                                                                       |
| Ciccone (2010) [26], pre-post-feasibility study | CVD <sup>a</sup> , diabetes, heart failure and/or risk of CVD patients (n=1160) | Baseline, 6, 12, and 18 months | Not applicable | Feasibility and effectiveness in terms of quality of life, therapy adherence, clinical outcomes (BP <sup>b</sup> , cholesterol, and glycosylated hemoglobin blood level) | <p><i>“Evaluate effectiveness of a disease and care management program and case managers”.</i></p> <ul style="list-style-type: none"> <li>- Patient is part of health care team including specialists, GPs<sup>c</sup> and care managers</li> <li>- Care Managers are appointed to GPs</li> <li>- Personal patient care plan</li> <li>- Care managers used an <i>evidence-based decision support tool</i> including, for example, health record, notifications related to patients’ health</li> </ul> |

|                                             |                                                              |                                                |                                                                                   |                                                                                       |                                                                                                                                                                                                                                                                                                                                                                                                                                                                                                                                                                      |
|---------------------------------------------|--------------------------------------------------------------|------------------------------------------------|-----------------------------------------------------------------------------------|---------------------------------------------------------------------------------------|----------------------------------------------------------------------------------------------------------------------------------------------------------------------------------------------------------------------------------------------------------------------------------------------------------------------------------------------------------------------------------------------------------------------------------------------------------------------------------------------------------------------------------------------------------------------|
|                                             |                                                              |                                                |                                                                                   |                                                                                       | situation, monitoring, and patient information materials.                                                                                                                                                                                                                                                                                                                                                                                                                                                                                                            |
| Smith (2008) [31], cluster RCT <sup>d</sup> | Physicians (n=97) <sup>e</sup> and diabetes patients (n=639) | Baseline and follow-up: 21 months (mean; 3-36) | Control group: standard information about cardiovascular risk reduction via email | Process of diabetes care, metabolic and cardiovascular risk factor control, and costs | <p><i>“To assess the effects of specialist telemedicine intervention on diabetes care outcomes”</i></p> <ul style="list-style-type: none"> <li>- Endocrinologist received medical data from <i>DEMs<sup>f</sup></i> and <i>EHR<sup>g</sup></i>. Based on this information they could write a tailored advice regarding cardiovascular risk using a <i>Web-form</i>. Additionally evidence based information was selected from the <i>digital library</i>.</li> <li>- Advice and evidence based messages were sent via <i>secure-email</i> to primary care</li> </ul> |

|                                                    |                                                  |                            |                                                                                                |                                                                          |                                                                                                                                                                                                                                                                                                                                                                                                                                          |
|----------------------------------------------------|--------------------------------------------------|----------------------------|------------------------------------------------------------------------------------------------|--------------------------------------------------------------------------|------------------------------------------------------------------------------------------------------------------------------------------------------------------------------------------------------------------------------------------------------------------------------------------------------------------------------------------------------------------------------------------------------------------------------------------|
|                                                    |                                                  |                            |                                                                                                |                                                                          | <p>(automatic) 48 hours before patients' visit. They could also pick the message up via the DEMS.</p> <ul style="list-style-type: none"> <li>- Primary care and patient decided how to continue after receiving the information.</li> </ul>                                                                                                                                                                                              |
| <p>Carallo (2015) [25], controlled study (1:2)</p> | <p>Diabetes mellitus type 2 patients (n=312)</p> | <p>Baseline and 1 year</p> | <p>Usual care: follow-up by hospital professionals (quarterly). GPs are informed by letter</p> | <p>Efficacy of the integrated care model in respect of clinical care</p> | <p><i>"To verify the efficacy of an integrated care model including GPs empowerment and use of a Web-based EHR in relation to usual care in a clinical setting".</i></p> <ul style="list-style-type: none"> <li>- Clinical care management shared between GPs and hospital professionals</li> <li>- <i>Connected EHR</i> to exchange clinical information</li> <li>- Diabetes type 2 training for GPs</li> <li>- Follow up by</li> </ul> |

|                          |                                                                                |                                        |                                    |                                                                                                                  |                                                                                                                                                                                                                                                                                                                                                                                                                                                                                                                      |
|--------------------------|--------------------------------------------------------------------------------|----------------------------------------|------------------------------------|------------------------------------------------------------------------------------------------------------------|----------------------------------------------------------------------------------------------------------------------------------------------------------------------------------------------------------------------------------------------------------------------------------------------------------------------------------------------------------------------------------------------------------------------------------------------------------------------------------------------------------------------|
|                          |                                                                                |                                        |                                    |                                                                                                                  | both GP (quarterly) and hospital professionals (annually).                                                                                                                                                                                                                                                                                                                                                                                                                                                           |
| Gurwitz (2014) [30], RCT | Elderly patients (>65) (all conditions included); hospital discharges (n=3661) | At least six months after end of study | Usual care: follow up at discharge | Primary care visits in 7-, 14-, and 30-day periods after hospital discharge and rehospitalization within 30 days | <p><i>“To assess the effect of EHR-based transitional care intervention on having an outpatient visit with a primary care provider after discharge on being rehospitalized within 30 days of discharge”</i></p> <ul style="list-style-type: none"> <li>- Use of EHR to inform GPs about their patients’ hospital discharge</li> <li>- GPs received extra medication related information and notification for planning a post hospitalization visit</li> <li>- PCP<sup>h</sup> staff received a message to</li> </ul> |

|                   |                                                           |                      |                                                                                                                                           |                                                                                                                                                                                                                                      |                                                                                                                                                                                                                                                                                                                                                                                                                                                                                                 |
|-------------------|-----------------------------------------------------------|----------------------|-------------------------------------------------------------------------------------------------------------------------------------------|--------------------------------------------------------------------------------------------------------------------------------------------------------------------------------------------------------------------------------------|-------------------------------------------------------------------------------------------------------------------------------------------------------------------------------------------------------------------------------------------------------------------------------------------------------------------------------------------------------------------------------------------------------------------------------------------------------------------------------------------------|
|                   |                                                           |                      |                                                                                                                                           |                                                                                                                                                                                                                                      | plan a visit with the PCP (except when EHR shows that visit is already planned).                                                                                                                                                                                                                                                                                                                                                                                                                |
| DICE [27],<br>RCT | Diabetes patients—insulin and non-insulin treated (n=274) | Baseline and 2 years | Usual care: patients were seen approximately every 4 months and received (computer generated) reminder letters about regular appointments | Metabolic control, psychosocial status, knowledge, wellbeing and treatment satisfaction, beliefs and control, disruption of normal activities, numbers of consultations and admissions, frequency of metabolic monitoring, and costs | <p><i>“Evaluated effectiveness and efficiency of computer coordinated integrated care for insulin and non-insulin treated patients”</i></p> <ul style="list-style-type: none"> <li>- 3 or 4 monthly GP and annually hospital visits.</li> <li>- Integrated care guidelines for GPs</li> <li>- <i>Computer-based patient record:</i> to notify GP (patient consults and clinical information) and patients (to make GP appointment) and for coordination of patient records. GP added</li> </ul> |

|                                                                                                                                                    |                                                                |                     |                                                                                                                        |                                                                                                                                                                                                                                                                 |                                                                                                                                                                                                                                                                                                                                                                                                                     |
|----------------------------------------------------------------------------------------------------------------------------------------------------|----------------------------------------------------------------|---------------------|------------------------------------------------------------------------------------------------------------------------|-----------------------------------------------------------------------------------------------------------------------------------------------------------------------------------------------------------------------------------------------------------------|---------------------------------------------------------------------------------------------------------------------------------------------------------------------------------------------------------------------------------------------------------------------------------------------------------------------------------------------------------------------------------------------------------------------|
|                                                                                                                                                    |                                                                |                     |                                                                                                                        |                                                                                                                                                                                                                                                                 | relevant information after a consult to the record, sent it back to hospital where the hospital updated computerized record and returned it to GP.                                                                                                                                                                                                                                                                  |
| Drummond [29], RCT (2x2x2; integrated or conventional outpatient care; peak flow self-monitoring or usual monitoring; enhanced or usual education) | Patients with asthma (n=712) visiting chest outpatient clinics | Baseline and 1 year | Usual care: 3 monthly visits at outpatient clinical. Receive clinical questionnaire before visit to give to specialist | Number of prescriptions for bronchodilators and inhaled steroids, use of oral steroids, general practice consultations, hospital admissions, sleep disturbance and other restrictions on normal activity; psychological aspects; patient satisfaction and costs | <p><i>“To evaluated in clinical, social, and economic terms, the effectiveness of integrated care”</i></p> <ul style="list-style-type: none"> <li>- Annually review of patients records by chest physicians using computer-based patient record</li> <li>- 3 monthly visits to GP</li> <li>- Computer generated questionnaire sent to patients and GP</li> </ul> <p>GP sends all clinical documents to hospital</p> |

|                                                 |                                                 |                      |                                                                 |                                                                                                                                        |                                                                                                                                                                                                                                                                                                                                                                                                                                                                          |
|-------------------------------------------------|-------------------------------------------------|----------------------|-----------------------------------------------------------------|----------------------------------------------------------------------------------------------------------------------------------------|--------------------------------------------------------------------------------------------------------------------------------------------------------------------------------------------------------------------------------------------------------------------------------------------------------------------------------------------------------------------------------------------------------------------------------------------------------------------------|
|                                                 |                                                 |                      |                                                                 |                                                                                                                                        | professional who adds information to patient computerized record. GP receives a copy including advice for changes in care.                                                                                                                                                                                                                                                                                                                                               |
| McGhee (1994) [28], RCT (3 groups) <sup>h</sup> | Patients with (controlled) hypertension (n=831) | Baseline and 2 years | Outpatient care and nurse practitioner clinic care <sup>h</sup> | Effectiveness (number of patients with complete review after 2 years), acceptability (eg, preferences and (dis) advantages), and costs | <p><i>“To investigate the feasibility, acceptability and cost effectiveness of shared general practitioner – hospital care for well-controlled hypertensive patients in an urban area by comparing this group with a specialist outpatient clinic and nurse practitioner clinic.”</i></p> <ul style="list-style-type: none"> <li>- Shared care between GP, specialist, patient and laboratory with determined roles.</li> <li>- Annually patient review by GP</li> </ul> |

|                                |                                    |                           |                                       |                                                            |                                                                                                                                                                                                                                                                                                                                                                                                                                                                                                 |
|--------------------------------|------------------------------------|---------------------------|---------------------------------------|------------------------------------------------------------|-------------------------------------------------------------------------------------------------------------------------------------------------------------------------------------------------------------------------------------------------------------------------------------------------------------------------------------------------------------------------------------------------------------------------------------------------------------------------------------------------|
|                                |                                    |                           |                                       |                                                            | <ul style="list-style-type: none"> <li>- Computerized database used to create medical record (two pages) for GP and patient record summary (“personal health booklet”)</li> <li>- After consult: GP sent medical record, results of clinical exams and patient-held record to shared care registry</li> <li>- Results reviews by staff using a protocol and marked abnormalities are reviewed by a specialist</li> <li>- Updated medical record including letter is sent back to GP.</li> </ul> |
| Casas (2006) [21], RCT (1:1.5) | COPD <sup>1</sup> patients (n=155) | 1, 3, 6, 9, and 12 months | Usual care without additional support | Primary: hospital readmission.<br>Secondary: mortality and | <i>Assess the effect of an integrated care intervention, supported by</i>                                                                                                                                                                                                                                                                                                                                                                                                                       |



|                                              |                       |                            |                                                     |                                                                                      |                                                                                                                                                                                                                                                                                                                                                                                                                                                                                                                                                      |
|----------------------------------------------|-----------------------|----------------------------|-----------------------------------------------------|--------------------------------------------------------------------------------------|------------------------------------------------------------------------------------------------------------------------------------------------------------------------------------------------------------------------------------------------------------------------------------------------------------------------------------------------------------------------------------------------------------------------------------------------------------------------------------------------------------------------------------------------------|
|                                              |                       |                            |                                                     | utilization of health care resources                                                 | <p><i>ICT<sup>f</sup>, on prevention of hospitalizations</i></p> <ul style="list-style-type: none"> <li>- Patient assessment at discharge,</li> <li>- Self-management program for patients</li> <li>- Patient tailored care plan shared between case manager and primary care professionals</li> <li>- <i>IT<sup>k</sup> platform</i> for case management to manage health records including <i>Web-based call center</i> to contact case manager.</li> </ul> <p>Follow up: specialized nurse and primary care team (Barcelona) and GP (Leuven).</p> |
| Garcia-Aymerich (2007) [22], RCT (1:2 ratio) | COPD patients (n=113) | Baseline, 6, and 12 months | Control group: patients received usual care without | Effectiveness: clinical, health-related quality of life, lifestyle, self-management, | <i>“To assess the effectiveness of an integrate care intervention to enhance clinical</i>                                                                                                                                                                                                                                                                                                                                                                                                                                                            |

|  |  |  |                                           |                                                      |                                                                                                                                                                                                                                                                                                                                                                                                                                                                                                                                                                                                            |
|--|--|--|-------------------------------------------|------------------------------------------------------|------------------------------------------------------------------------------------------------------------------------------------------------------------------------------------------------------------------------------------------------------------------------------------------------------------------------------------------------------------------------------------------------------------------------------------------------------------------------------------------------------------------------------------------------------------------------------------------------------------|
|  |  |  | <p>additional support after discharge</p> | <p>medical treatment, and patients' satisfaction</p> | <p><i>status, health-related quality of life, lifestyle, self-management, medical treatment, and patients' satisfaction to explain reduction in readmissions''</i></p> <ul style="list-style-type: none"> <li>- Patient assessment at discharge,</li> <li>- Self-management program for patients</li> <li>- Patient tailored care plan (by case manager and primary care)</li> <li>- <i>IT platform</i> for case management to manage health records including <i>Web-based call center</i> to contact case manager.</li> <li>- Follow up: specialized nurse and primary care team (Barcelona).</li> </ul> |
|--|--|--|-------------------------------------------|------------------------------------------------------|------------------------------------------------------------------------------------------------------------------------------------------------------------------------------------------------------------------------------------------------------------------------------------------------------------------------------------------------------------------------------------------------------------------------------------------------------------------------------------------------------------------------------------------------------------------------------------------------------------|

|                                                     |                                                                       |                                                 |                                                        |                                                                                                                                                         |                                                                                                                                                                                                                                                                                                                                                                                                                    |
|-----------------------------------------------------|-----------------------------------------------------------------------|-------------------------------------------------|--------------------------------------------------------|---------------------------------------------------------------------------------------------------------------------------------------------------------|--------------------------------------------------------------------------------------------------------------------------------------------------------------------------------------------------------------------------------------------------------------------------------------------------------------------------------------------------------------------------------------------------------------------|
| <p>Jefford<br/>(2008)<br/>[32], RCT<br/>(1:1)</p>   | <p>GPs taking<br/>care of<br/>cancer<br/>patients (n=97)</p>          | <p>Baseline and<br/>7 days<br/>(range 6-15)</p> | <p>Usual<br/>information<br/>without extra<br/>tax</p> | <p>GPs’<br/>confidence,<br/>knowledge,<br/>satisfaction, and<br/>perception</p>                                                                         | <p><i>“To examine the effectiveness of information regarding chemotherapy, potential adverse effects and recommended managements in improving GPs knowledge, confidence, satisfaction regarding communication, and shared care and perception of information received”.</i><br/><br/> <i>Fax was used to provide GPs with extra information about patient-, chemotherapy specific and contact information.</i></p> |
| <p>Lalonde<br/>(2008)<br/>[23], cluster<br/>RCT</p> | <p>Pharmacies<br/>(n=42)<sup>d</sup>,<br/>pharmacists<br/>(n=101)</p> | <p>Baseline and<br/>6 months</p>                | <p>Usual care<br/>without<br/>ProFiL<br/>program</p>   | <p>Feasibility and<br/>impact: primary<br/>outcomes:<br/>number of<br/>pharmaceutical<br/>opinions or<br/>refusals,<br/>secondary:<br/>pharmacists’</p> | <p><i>“Assess the feasibility and impact of implementing ProFiL (to improve community pharmacists’ management of</i></p>                                                                                                                                                                                                                                                                                           |

|                                   |                                                                                  |                       |                                   |                                                                                          |                                                                                                                                                                                                                                                                                                                                                                                                                                                                         |
|-----------------------------------|----------------------------------------------------------------------------------|-----------------------|-----------------------------------|------------------------------------------------------------------------------------------|-------------------------------------------------------------------------------------------------------------------------------------------------------------------------------------------------------------------------------------------------------------------------------------------------------------------------------------------------------------------------------------------------------------------------------------------------------------------------|
|                                   |                                                                                  |                       |                                   | knowledge and satisfaction                                                               | <p><i>medication related problems), on the incidence of pharmaceutical opinions and refusals.”</i></p> <ul style="list-style-type: none"> <li>- Community pharmacists received training, access to hospital consultation service and communication network.</li> <li>- Fax was used to inform community pharmacists about patients’ medication and clinical information.</li> <li>- Pharmacists could send recommendations to the specialist (standard from)</li> </ul> |
| Santschi (2011) [24], cluster RCT | Pharmacies (n=42) <sup>d</sup> , pharmacists (n=101), and chronic kidney disease | Baseline and 6 months | Usual care without ProFiL program | Change in BP, number of patients with BP controlled, number of hypertension drug related | <p><i>“To assess the impact of ProFiL (to improve community pharmacists’ management of medication</i></p>                                                                                                                                                                                                                                                                                                                                                               |

|                              |                                                                                                          |                                                              |                                                                                                           |                                                 |                                                                                                                                                                                                                                                                                                                                                                                                                                         |
|------------------------------|----------------------------------------------------------------------------------------------------------|--------------------------------------------------------------|-----------------------------------------------------------------------------------------------------------|-------------------------------------------------|-----------------------------------------------------------------------------------------------------------------------------------------------------------------------------------------------------------------------------------------------------------------------------------------------------------------------------------------------------------------------------------------------------------------------------------------|
|                              | patients (n=90)                                                                                          |                                                              |                                                                                                           | problems, and community-pharmacist intervention | <p><i>related problems) on BP control and management of hypertension management.”</i></p> <ul style="list-style-type: none"> <li>- Community pharmacists received training, access to hospital consultation service and communication network.</li> <li>- <i>Fax</i> was used to send community pharmacists, at baseline, a summary with clinical information (health problems, BP levels, laboratory results, medications).</li> </ul> |
| Wulff (2013) [33], RCT (1:1) | Patients with colorectal cancer or highly probably diagnoses (n=280) from a hospital surgical department | Baseline and follow-up 270 days (divided in 90 day periods). | Usual care. GPs received electronic note about diagnosis and electronic discharge summary after treatment | GP evaluations and patients' contacts with GPs  | <p><i>“To analyze effects of hospital-based case management on GPs' evaluation of intersectoral collaboration and information from the</i></p>                                                                                                                                                                                                                                                                                          |

|  |  |  |  |  |                                                                                                                                                                                                                                                                                                                                                                                                                                |
|--|--|--|--|--|--------------------------------------------------------------------------------------------------------------------------------------------------------------------------------------------------------------------------------------------------------------------------------------------------------------------------------------------------------------------------------------------------------------------------------|
|  |  |  |  |  | <p><i>hospital, patients contact with GPs during daytime and out of hour”</i></p> <ul style="list-style-type: none"> <li>- Case manager informs GP about patients’ condition</li> <li>- GPs received extra <i>Electronic summary message</i> (on top of usual information received from surgeons) regarding patients’ consult with case manager and regarding change in care when surgical department was involved.</li> </ul> |
|--|--|--|--|--|--------------------------------------------------------------------------------------------------------------------------------------------------------------------------------------------------------------------------------------------------------------------------------------------------------------------------------------------------------------------------------------------------------------------------------|

<sup>a</sup>CVD: cardiovascular disease.

<sup>b</sup>BP: blood pressure.

<sup>c</sup>GP: general practitioner.

<sup>d</sup>RCT: randomized controlled trial.

<sup>e</sup>randomized group.

<sup>f</sup>DEM: diabetes electronic management system.

<sup>g</sup>EHR: electronic health record.

<sup>h</sup>Patients were randomized between shared and outpatient care. The nurse practitioner clinic care group was added as an additional comparative group.

<sup>i</sup>COPD: chronic obstructive pulmonary disease.

<sup>j</sup>ICT: information and communication technology.

<sup>k</sup>IT: information technology.
