# Supplementary material for: The Effectiveness of Information Technology-Supported Shared Care for Patients With Chronic Disease: A Systematic Review
Source: PubMed Central journal article supplement (PMC5500776; doi:10.2196/jmir.7405), 2017-06-22

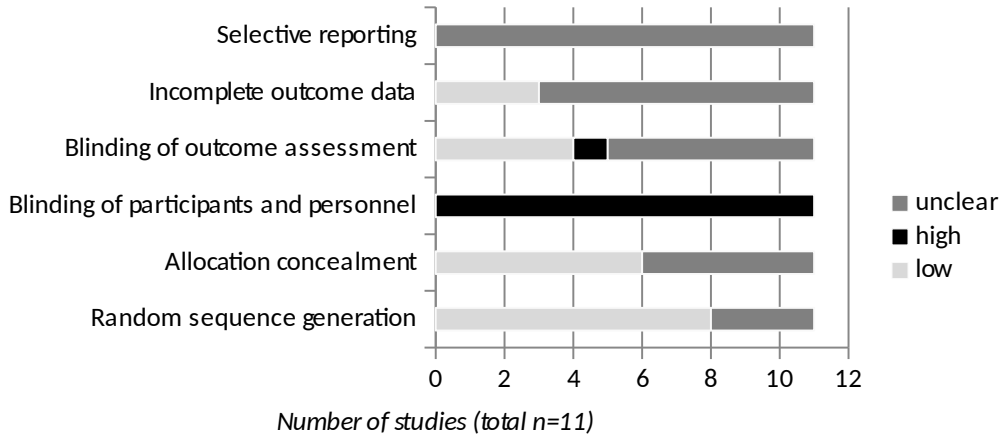

Supplement: jmir_v19i6e221_app4.pdf [file jmir_v19i6e221_app4.pdf]
